# Supplementary material
Source: PubMed Central journal article supplement (PMC1283422)

CD147-WT

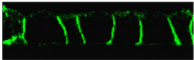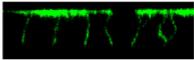

CD147-L252A

MCT1

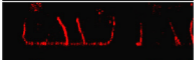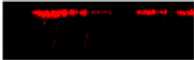

MCT1

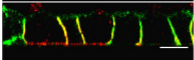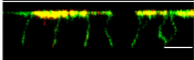

X-Z

Supplement: pnas_0504419102_1.pdf [file pnas_0504419102_1.pdf]

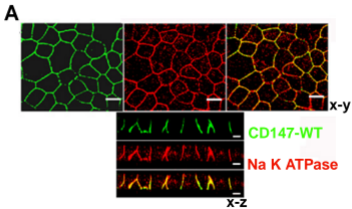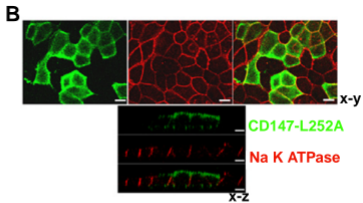

Supplement: pnas_0504419102_2.pdf [file pnas_0504419102_2.pdf]

**A**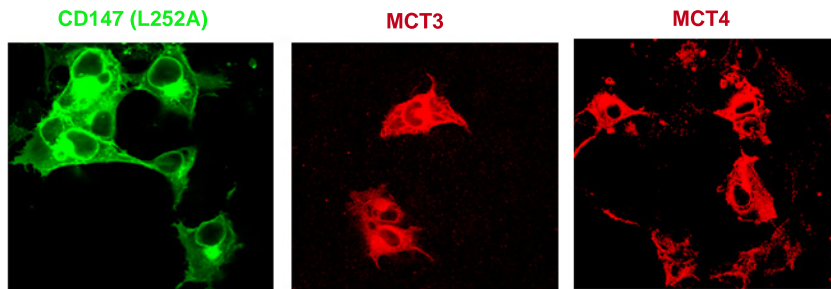**B**

CD147(L252A)  
MCT3  
DAPI

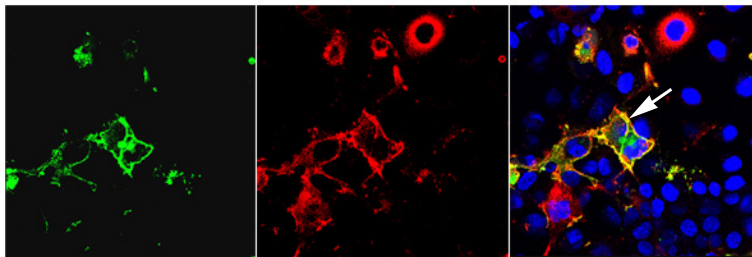

CD147(L252A)  
MCT4  
DAPI

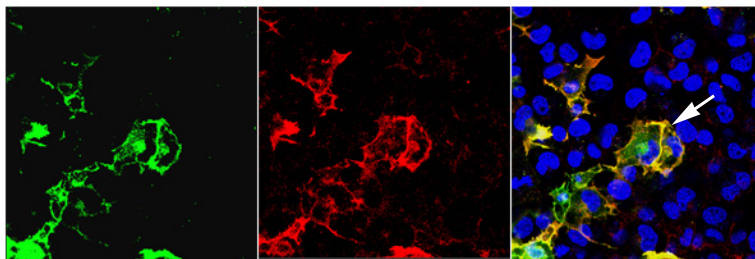

Supplement: pnas_0504419102_3.pdf [file pnas_0504419102_3.pdf]

**A**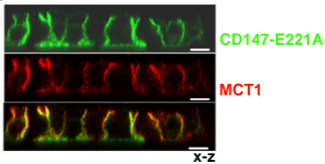**B**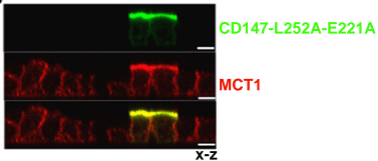

Supplement: pnas_0504419102_4.pdf [file pnas_0504419102_4.pdf]

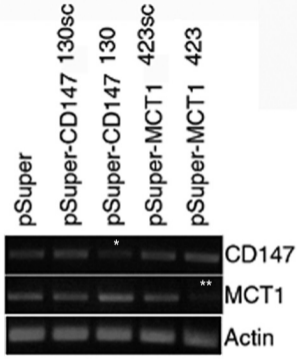

Supplement: pnas_0504419102_5.pdf [file pnas_0504419102_5.pdf]
